# Supplementary material
Source: Springer Nature journal article supplement (https://www.springermedizin.de/resource/supplementary/12889_2014_6591_MOESM4_ESM.pdf/9498636)

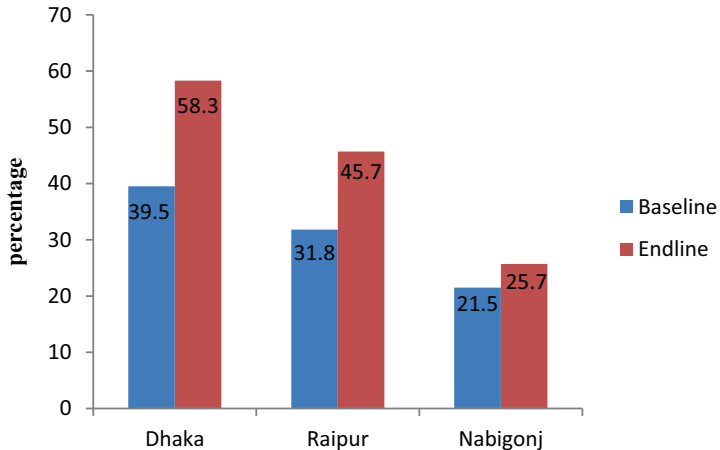

Supplement: MOESM4 [file 9498636]
